# Supplementary material
Source: PubMed Central journal article supplement (PMC8208639)
Supplement: NIHMS1681617-supplement-Data_Supplement.pdf [file NIHMS1681617-supplement-Data_Supplement.pdf]

## DATA SUPPLEMENT

### **Neutrophil extracellular traps (NETs) promote the development of intracranial aneurysm rupture**

Masaaki Korai<sup>1\*</sup>, James Purcell<sup>1\*</sup>, Yoshinobu Kamio<sup>1\*</sup>, Kazuha Mitsui<sup>1</sup>, Hajime Furukawa<sup>1</sup>, Kimihiko Yokosuka<sup>1</sup>, Hitomi Sato<sup>1</sup>, Hiroki Sato<sup>1</sup>, Satoru Eguchi<sup>2</sup>, Jinglu Ai<sup>1</sup>, Michael Lawton<sup>1,3</sup>, Tomoki Hashimoto<sup>1</sup>

\*co-first authors.

<sup>1</sup>Barrow Aneurysm and AVM Research Center, Barrow Neurological Institute, Phoenix, Arizona, U.S.A.

<sup>2</sup>Cardiovascular Research Center, Lewis Katz School of Medicine at Temple University, Philadelphia, PA, U.S.A.

<sup>3</sup>Department of Neurosurgery, Barrow Neurological Institute, Phoenix, Arizona, U.S.A.

#### **Corresponding author**

Tomoki Hashimoto, MD

Barrow Aneurysm and AVM Research Center,

Departments of Neurosurgery and Neurobiology

Barrow Neurological Institute, 350 W. Thomas Road, Phoenix, AZ, 85013

Email: [tomoki.hashimoto@barrowneuro.org](mailto:tomoki.hashimoto@barrowneuro.org)

PHONE: 602-406-3487

FAX: 602-406-4172

## Expanded Materials & Methods

### Histology

For the quantitative analysis of NETs and neutrophils, we collected the brain tissue samples from the mice treated with vehicle or Cl-amidine at 8 days after aneurysm induction (n = 5 from each group). The mice were transcardially perfused with phosphate-buffered saline (PBS), followed by 4% of paraformaldehyde. The brain tissues were post-fixed with 4% paraformaldehyde for 24 hours, then immersed in 15% sucrose for 24 hours, 30% sucrose for another 24 hours. The brain tissues were embedded in optimal cutting temperature compound (OCT, Tissue-Tek) at -80°C. Sections were cut near the middle cerebral artery with a cryostat. Sections were immunohistochemically stained with antibodies for NETs (citrullinated histone H3 (H3-Cit), ab5103, Abcam, Cambridge, MA) and neutrophils (Ly-6G, BD, San Jose, CA). Sections were incubated in primary antibody overnight at 4°C, followed by incubation with corresponding biotinylated secondary antibodies (Vector Laboratories, Burlingame, CA) and with a complex of avidin-biotin-horseradish peroxidase (Vector Laboratories). Immunoreactivity was visualized by incubating the sections with 0.05% 3,3'-diaminobenzidine (DAB, Vector Laboratories). Nuclei were visualized by counterstaining with aqueous hematoxylin. We chose the field with the highest number of cells around the middle cerebral artery for each sample and quantified the number of the infiltrated cells by cell counting (positive immunohistochemically stained cells) per high-power field ( $\times 40$ ).

### Real-time PCR detection of pro-inflammatory cytokines

We collected total RNA samples from cerebral arteries (Circle of Willis, including aneurysms) 8 days after aneurysm induction as previously described.<sup>1, 2</sup> We chose 8 days after elastase injection for these analyses to capture the molecular and histological changes that occur before aneurysms start rupturing. Our previous studies showed that aneurysms start rupturing around 7 - 8 days after aneurysm induction.<sup>3, 4</sup> We collected the aneurysm tissues from mice that were treated with Cl-amidine or vehicle (n = 7 for each group). We measured mRNA expression levels of inflammation-related cytokines (ICAM-1 [intracellular adhesion molecule 1], IL-1 $\beta$  [interleukin-1 beta], MCP-1 [monocyte chemoattractant protein-1], TNF- $\alpha$  [tumor necrosis factor- $\alpha$ ], CXCL-1 [chemokine (CXC motif) ligand-1], MIP-2 [macrophage inflammatory protein-2], and E-selectin. RNA was extracted using the RNeasy Mini Kit (Qiagen, Germantown, MD) and transcribed to cDNA using the QuantiTect reverse transcription kit (Qiagen). The mRNA expression levels were determined using SYBR Green technology (Applied Biosystems, Foster City, CA). Quantitative values were obtained from the threshold cycle value (Ct), and the data were analyzed by the  $2^{-\Delta\Delta CT}$  method. GAPDH (glyceraldehyde-3-phosphate dehydrogenase) expression was quantified and used as an internal RNA control.

### References

1. Shikata F, Shimada K, Sato H, Ikedo T, Kuwabara A, Furukawa H, Korai M, Kotoda M, Yokosuka K, Makino H, et al. Potential influences of gut microbiota on the formation of intracranial aneurysm. *Hypertension*. 2019;73:491-496

2. Shimada K, Furukawa H, Wada K, Wei Y, Tada Y, Kuwabara A, Shikata F, Kanematsu Y, Lawton MT, Kitazato KT, et al. Angiotensin-(1-7) protects against the development of aneurysmal subarachnoid hemorrhage in mice. *J Cereb Blood Flow Metab.* 2015;35:1163-1168
3. Tada Y, Wada K, Shimada K, Makino H, Liang EI, Murakami S, Kudo M, Kitazato KT, Nagahiro S, Hashimoto T. Roles of hypertension in the rupture of intracranial aneurysms. *Stroke.* 2014;45:579-586
4. Makino H, Tada Y, Wada K, Liang EI, Chang M, Mobashery S, Kanematsu Y, Kurihara C, Palova E, Kanematsu M, et al. Pharmacological stabilization of intracranial aneurysms in mice: A feasibility study. *Stroke.* 2012;43:2450-2456

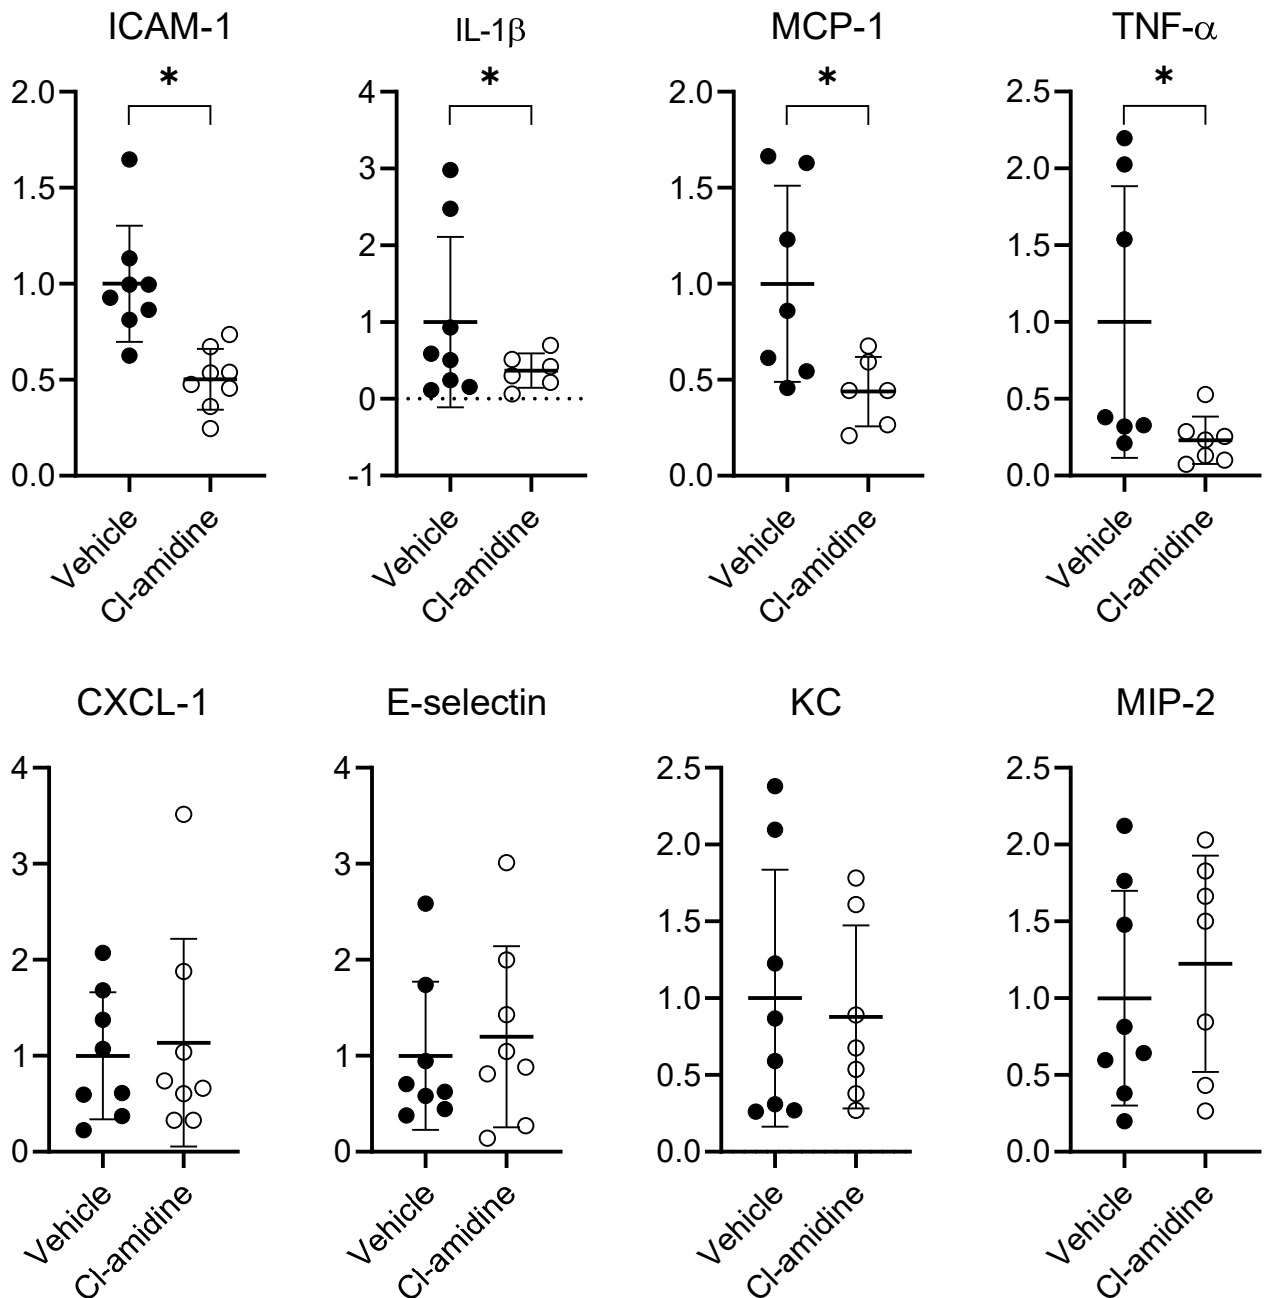

**Figure S1. Pharmacological inhibition of NETs formation decreased mRNA expression of pro-inflammatory cytokines in cerebral arteries.** Cl-amidine-treated mice had significantly decreased mRNA expression of ICAM-1, IL-1 $\beta$ , MCP-1 and TNF- $\alpha$  as compared to vehicle-treated controls. No significant difference was detected on the mRNA expression of CXCL-1, E-selectin, KC and MIP-2. Data are expressed as means  $\pm$  standard deviation, the Mann-Whitney test, \*  $P < 0.05$ .

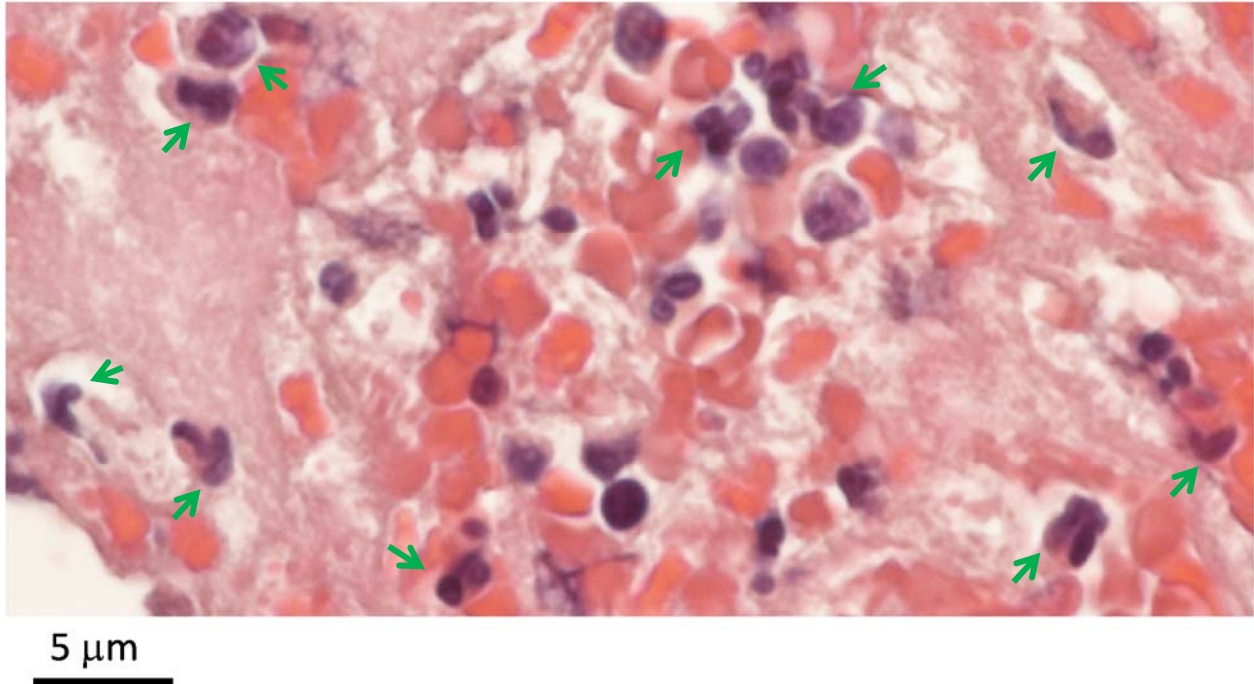

**Figure S2. Aggregation of polymorphonuclear cells in artery wall from an unruptured human aneurysm.** The image is from the same area marked in the left panel-upper image in Figure 1A (hematoxylin and eosin staining). The area was positively stained by H3Cit (NETs marker), and largely overlapping with MPO staining (neutrophils marker), but not with CD68 (macrophages marker, See Figure 1A). Polymorphonuclear cells (presumably neutrophils) are indicated with green arrows.
